# Supplementary material for: Direct liquid phase synthesis of ordered L10 FePt colloidal particles with high coercivity using an Au nanoparticle seeding approach
Source: Royal Society of Chemistry journal article supplement (doi:10.1039/c6nj01801g), 2016-01-01
Supplement: c6nj01801g1.pdf [file c6nj01801g1.pdf]

## Electronic Supplementary Information

Direct liquid phase synthesis of ordered L1<sub>0</sub> FePt colloidal particles with  
high coercivity using an Au nanoparticles seeding approach

*Vasileios Tzitzios<sup>\*,a, b</sup> Georgia Basina,<sup>b</sup> Nikolaos Tzitzios,<sup>c</sup> Vasileios Alexandrakis,<sup>b,c</sup>*

*Xiaocao Hu<sup>c</sup> and George Hadjipanayis<sup>a</sup>*

<sup>a</sup> Department of Physics & Astronomy, University of Delaware, Newark, DE 19716, USA

<sup>b</sup> Institute of Nanoscience and Nanotechnology, N.C.S.R. “Demokritos” Athens 15310, Greece

<sup>c</sup> Department of Materials Science and Engineering, University of Ioannina, Ioannina 45110, Greece

<sup>d</sup> Department of Materials Science and Engineering, University of Delaware, Newark, DE 19716, USA

### Corresponding Author

\* Vasileios Tzitzios, e-mail address: v.tzitzios@inn.demokritos.gr, Phone number: 0030 2106503321, University of Delaware, Department of Physics and Astronomy, Newark, DE 19716 and Institute of Nanoscience and Nanotechnology, NCSR Demokritos, Athens, Greece, 15310

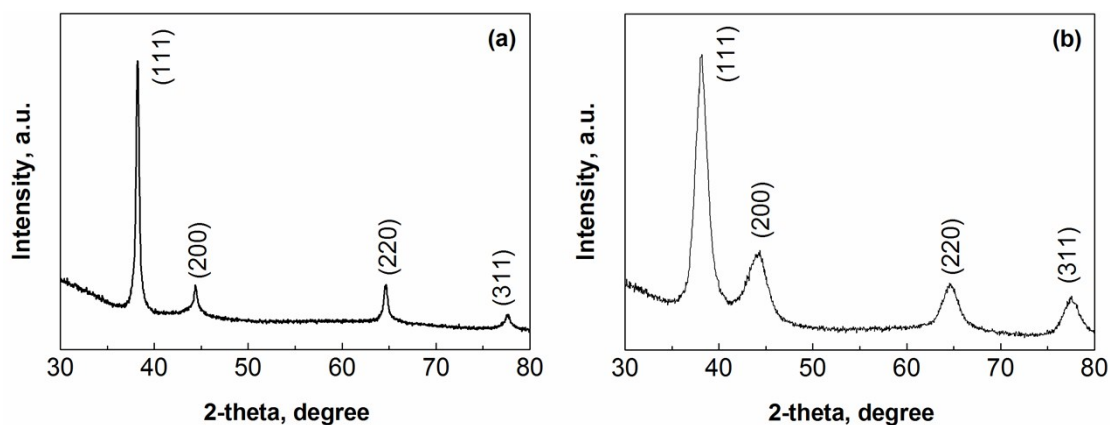

**Figure S1.** XRD patterns from organophilic Au nanoparticles capped with oleyl amine molecules (a) 11.8 nm and (b) 5.9 nm mean diameter estimated according to Scherrer equation.

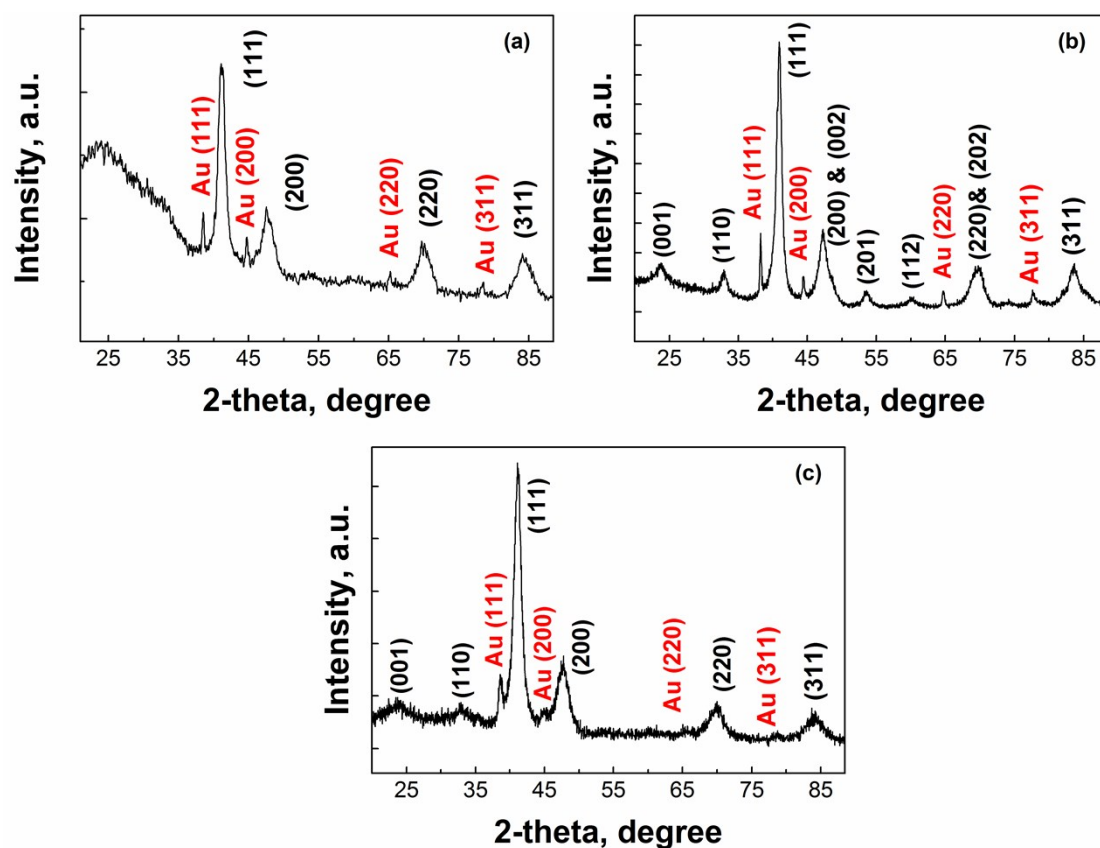

**Figure S2.** X-ray diffraction patterns from FePt nanoparticles synthesized in the presence of 12 nm Au nanoparticles in paraffin oil at 325 (a), 360 (b), 380 (c).

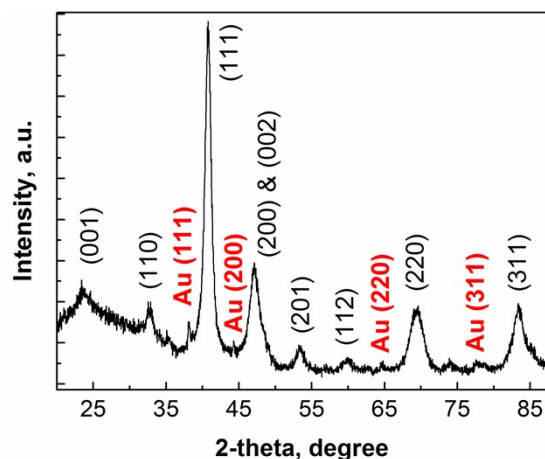

**Figure S3.** XRD pattern from L1<sub>0</sub> FePt nanoparticles synthesized at 300 °C using 6 nm Au particles as seeds.

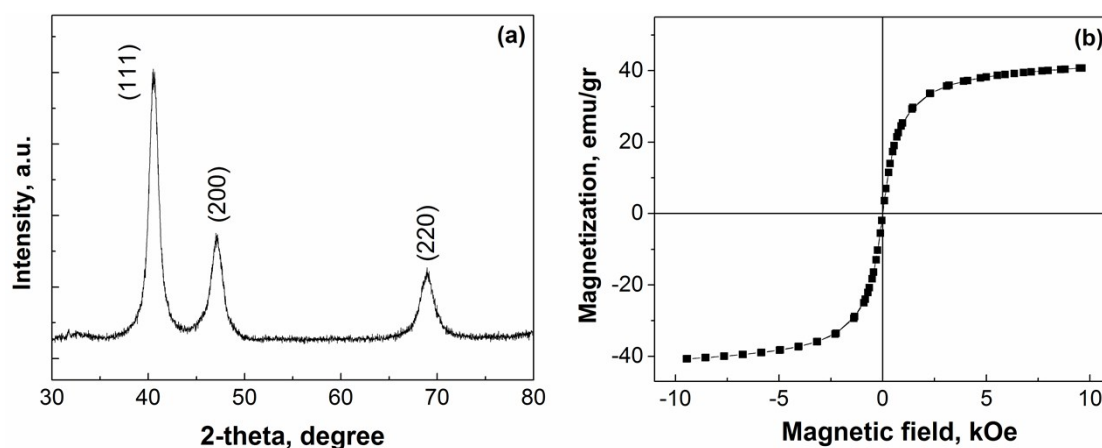

**Figure S4.** X-ray diffraction pattern (a) and magnetic hysteresis loop (b) at room temperature of the FePt particles prepared at 250 °C with 6 nm Au nanoparticles.

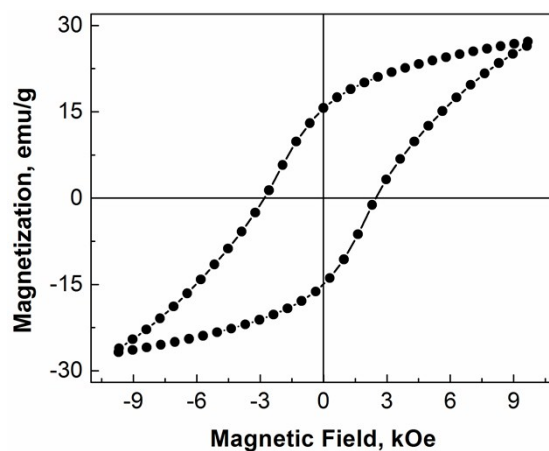

**Figure S5.** Room temperature magnetic hysteresis loop of L1<sub>0</sub> FePt synthesized with 12 nm mean diameter Au particles seeds. The reaction took place at 360 °C for 90 min.
